# Supplementary material for: The prediction of candidate genes for cervix related cancer through gene ontology and graph theoretical approach
Source: Royal Society of Chemistry journal article supplement (doi:10.1039/c4mb00004h), 2014-02-05
Supplement: c4mb00004h1.xlsx [file c4mb00004h1.xlsx]

## Sheet: Sheet1
GO Term	Description	Ontologies Present
GO:0008385	IkappaB kinase complex	Cellular Component
GO:0035631	CD40 receptor complex	Cellular Component
GO:0016323	basolateral plasma membrane	Cellular Component
GO:0031965	nuclear membrane	Cellular Component
GO:0043235	receptor complex	Cellular Component
GO:0012506	vesicle membrane	Cellular Component
GO:0030235	nitric-oxide synthase regulator activity	Molecular Function
GO:0008384	IkappaB kinase activity	Molecular Function
GO:0030618	transforming growth factor beta receptor, pathway-specific cytoplasmic mediator activity	Molecular Function
GO:0005072	transforming growth factor beta receptor, cytoplasmic mediator activity	Molecular Function
GO:0004716	receptor signaling protein tyrosine kinase activity	Molecular Function
GO:0001103	RNA polymerase II repressing transcription factor binding	Molecular Function
GO:0043548	phosphatidylinositol 3-kinase binding	Molecular Function
GO:0046875	ephrin receptor binding	Molecular Function
GO:0042169	SH2 domain binding	Molecular Function
GO:0045309	protein phosphorylated amino acid binding	Molecular Function
GO:0033613	activating transcription factor binding	Molecular Function
GO:0051219	phosphoprotein binding	Molecular Function
GO:0070491	repressing transcription factor binding	Molecular Function
GO:0035258	steroid hormone receptor binding	Molecular Function
GO:0019903	protein phosphatase binding	Molecular Function
GO:0001047	core promoter binding	Molecular Function
GO:0001085	RNA polymerase II transcription factor binding	Molecular Function
GO:0035257	nuclear hormone receptor binding	Molecular Function
GO:0019902	phosphatase binding	Molecular Function
GO:0005057	receptor signaling protein activity	Molecular Function
GO:0051427	hormone receptor binding	Molecular Function
GO:0002326	B cell lineage commitment	Biological Process
GO:0031053	primary miRNA processing	Biological Process
GO:0070141	response to UV-A	Biological Process
GO:0044783	G1 DNA damage checkpoint	Biological Process
GO:0060396	growth hormone receptor signaling pathway	Biological Process
GO:0031571	mitotic G1 DNA damage checkpoint	Biological Process
GO:0007183	SMAD protein complex assembly	Biological Process
GO:2000811	negative regulation of anoikis	Biological Process
GO:0023014	signal transduction by phosphorylation	Biological Process
GO:0001836	release of cytochrome c from mitochondria	Biological Process
GO:0051851	modification by host of symbiont morphology or physiology	Biological Process
GO:0043921	modulation by host of viral transcription	Biological Process
GO:0052472	modulation by host of symbiont transcription	Biological Process
GO:0055072	iron ion homeostasis	Biological Process
GO:0033598	mammary gland epithelial cell proliferation	Biological Process
GO:2000209	regulation of anoikis	Biological Process
GO:0051702	interaction with symbiont	Biological Process
GO:0000060	protein import into nucleus, translocation	Biological Process
GO:0001782	B cell homeostasis	Biological Process
GO:0050999	regulation of nitric-oxide synthase activity	Biological Process
GO:0008637	apoptotic mitochondrial changes	Biological Process
GO:0051402	neuron apoptotic process	Biological Process
GO:0070997	neuron death	Biological Process
GO:0055076	transition metal ion homeostasis	Biological Process
GO:0002260	lymphocyte homeostasis	Biological Process
GO:0070423	nucleotide-binding oligomerization domain containing signaling pathway	Biological Process
GO:0035872	nucleotide-binding domain, leucine rich repeat containing receptor signaling pathway	Biological Process
GO:0001776	leukocyte homeostasis	Biological Process
GO:0045428	regulation of nitric oxide biosynthetic process	Biological Process
GO:0032768	regulation of monooxygenase activity	Biological Process
GO:0031294	lymphocyte costimulation	Biological Process
GO:0031295	T cell costimulation	Biological Process
GO:0000186	activation of MAPKK activity	Biological Process
GO:0034612	response to tumor necrosis factor	Biological Process
GO:0006919	activation of cysteine-type endopeptidase activity involved in apoptotic process	Biological Process
GO:0097202	activation of cysteine-type endopeptidase activity	Biological Process
GO:2001235	positive regulation of apoptotic signaling pathway	Biological Process
GO:0006606	protein import into nucleus	Biological Process
GO:0051170	nuclear import	Biological Process
GO:0017038	protein import	Biological Process
GO:0097285	cell-type specific apoptotic process	Biological Process
GO:0034166	toll-like receptor 10 signaling pathway	Biological Process
GO:0034146	toll-like receptor 5 signaling pathway	Biological Process
GO:0051341	regulation of oxidoreductase activity	Biological Process
GO:0034162	toll-like receptor 9 signaling pathway	Biological Process
GO:0032481	positive regulation of type I interferon production	Biological Process
GO:0032319	regulation of Rho GTPase activity	Biological Process
GO:0043524	negative regulation of neuron apoptotic process	Biological Process
GO:0007005	mitochondrion organization	Biological Process
GO:0038124	toll-like receptor TLR6:TLR2 signaling pathway	Biological Process
GO:0038123	toll-like receptor TLR1:TLR2 signaling pathway	Biological Process
GO:0002431	Fc receptor mediated stimulatory signaling pathway	Biological Process
GO:0002433	immune response-regulating cell surface receptor signaling pathway involved in phagocytosis	Biological Process
GO:0038096	Fc-gamma receptor signaling pathway involved in phagocytosis	Biological Process
GO:0038094	Fc-gamma receptor signaling pathway	Biological Process
GO:0042770	signal transduction in response to DNA damage	Biological Process
GO:2000045	regulation of G1/S transition of mitotic cell cycle	Biological Process
GO:0009895	negative regulation of catabolic process	Biological Process
GO:0032479	regulation of type I interferon production	Biological Process
GO:0002756	MyD88-independent toll-like receptor signaling pathway	Biological Process
GO:0035666	TRIF-dependent toll-like receptor signaling pathway	Biological Process
GO:0034138	toll-like receptor 3 signaling pathway	Biological Process
GO:0051092	positive regulation of NF-kappaB transcription factor activity	Biological Process
GO:0072331	signal transduction by p53 class mediator	Biological Process
GO:0050852	T cell receptor signaling pathway	Biological Process
GO:0043623	cellular protein complex assembly	Biological Process
GO:0006913	nucleocytoplasmic transport	Biological Process
GO:0051169	nuclear transport	Biological Process
GO:0043627	response to estrogen stimulus	Biological Process
GO:0009411	response to UV	Biological Process
GO:0043523	regulation of neuron apoptotic process	Biological Process
