# Supplementary material for: The prediction of candidate genes for cervix related cancer through gene ontology and graph theoretical approach
Source: Royal Society of Chemistry journal article supplement (doi:10.1039/c4mb00004h), 2014-02-05
Supplement: c4mb00004h3.pdf [file c4mb00004h3.pdf]

### Predicted candidate gene as trials for other disease

| S. No. | Predicted cancer genes | Database identified | Targets           | Disease                                                                                                          | Pathways                                                                                                                                                                                                |
|--------|------------------------|---------------------|-------------------|------------------------------------------------------------------------------------------------------------------|---------------------------------------------------------------------------------------------------------------------------------------------------------------------------------------------------------|
| 1      | JUN                    | TTD                 | Clinical trial    | Melanoma, breast cancer, Rheumatoid arthritis, cancer and vascular disease                                       | Pathways in cancer, B-cell and T-cell receptor signalling pathway, colorectal cancer and Renal cell carcinoma.                                                                                          |
| 2      | JAK2                   | TTD                 | Clinical trial    | Hodgkin's disease, unspecified<br>Leukemia, unspecified<br>Vascular disease                                      | Adipocytokine signaling pathway<br>Chemokine signaling pathway<br>Jak STAT signaling pathway                                                                                                            |
| 3      | SMAD3                  | TTD                 | Research Target   | Lung fibrosis                                                                                                    | Not specified                                                                                                                                                                                           |
| 4      | SRC                    | TTD                 | Successful target | Breast cancer<br>Cancer, unspecific<br>Osteoporosis and other bone related diseases<br>Osteoporosis, unspecified | Adherens junction<br>Epithelial cell signaling in Helicobacter pylori<br>ErbB signaling pathway<br>Focal adhesion<br>Gap junction<br>GnRH signaling pathway<br>Tight junction<br>VEGF signaling pathway |
| 5      | INSR                   | TTD                 | Successful Target | Diabetes mellitus                                                                                                | Insulin signaling pathway<br>Type II diabetes mellitus                                                                                                                                                  |
| 6      | ERBB3                  | TTD                 | Clinical trial    | Advanced non-small cell lung cancer ,<br>Lung adenocarcinoma                                                     | Calcium signaling pathway<br>ErbB signaling pathway                                                                                                                                                     |
